# Supplementary material for: Temperature regulates hypoxia-inducible factor-1 (HIF-1) in a poikilothermic vertebrate, crucian carp (Carassius carassius)
Source: Oxford University Press journal article supplement (doi:10.1242/jeb.02103), 2006-03-02
Supplement: jeb02103tables1.pdf [file jeb02103tables1.pdf]

Table S1. *Correlation of HIF-1 $\alpha$  protein amounts between different tissues in crucian carp*

---

|        | Liver    | Heart    | Gills    | Kidney |
|--------|----------|----------|----------|--------|
| Liver  | 1        |          |          |        |
| Heart  | 0.804635 | 1        |          |        |
| Gills  | 0.836895 | 0.803971 | 1        |        |
| Kidney | 0.783969 | 0.751661 | 0.845377 | 1      |

---

Correlation matrix of HIF-1 $\alpha$  protein amounts in different tissues of normoxic crucian carp. Values are correlation coefficients.

---
